# Supplementary material for: Extensive Introgression among Ancestral mtDNA Lineages: Phylogenetic Relationships of the Utaka within the Lake Malawi Cichlid Flock
Source: PubMed Central journal article supplement (PMC3357950; doi:10.1155/2012/865603), 2012-05-10
Supplement: 865603.f1.pdf [file 865603.f1.pdf]

Supplementary Table: List of the specimens, their sampling location, and the mtDNA clade they were assigned to in this study. Clade names follow denomination given in the text.

| <b>NCBI Accession</b>                                                                                                              | <b>Species</b>                                | <b>Sampling location</b> | <b>mtDNA clade</b> |
|------------------------------------------------------------------------------------------------------------------------------------|-----------------------------------------------|--------------------------|--------------------|
| EF211836<br>EF211839<br>EF211887<br>EF211889<br>EF211893-EF211895<br>EF211897-EF211899<br>EF211902                                 | <i>Copadichromis</i> sp. 'virginialis kajose' | Senga Bay                | non-Mbuna          |
| EF211851<br>EF211856<br>EF211913                                                                                                   | <i>Copadichromis</i> sp. 'virginialis kajose' | Chilumba                 | non-Mbuna          |
| EF211870-EF211871<br>EF211876- EF211879<br>EF211881-EF211882<br>EF211928<br>EF211930- EF211935<br>EF211938<br>EF211942<br>EF211944 | <i>Copadichromis</i> sp. 'virginialis kajose' | Nkhudzi Bay              | non-Mbuna          |
| EF647211<br>EF647216<br>EF647219<br>EF647222<br>EF647226                                                                           | <i>Copadichromis</i> sp. 'virginialis kajose' | Lake Malombe             | non-Mbuna          |
| EF647230- EF647231<br>EF647233-EF647239                                                                                            | <i>Copadichromis</i> sp. 'virginialis kajose' | Chenga trawler           | non-Mbuna          |
| EF647248                                                                                                                           | <i>Copadichromis</i> sp. 'virginialis kajose' | Nkhotakota               | non-Mbuna          |
| EF647251<br>EF647253-EF647260                                                                                                      | <i>Copadichromis</i> sp. 'virginialis kajose' | Nkhata Bay (Sanga Beach) | non-Mbuna          |
| EF647261-EF647272                                                                                                                  | <i>Copadichromis</i> sp. 'virginialis kajose' | Mbenji Islands           | non-Mbuna          |
| EF647273-EF647285                                                                                                                  | <i>Copadichromis chrysonotus</i>              | Lake Malombe             | non-Mbuna          |
| EF647286-EF647297                                                                                                                  | <i>Copadichromis chrysonotus</i>              | Chilumba                 | non-Mbuna          |
| EF647298-EF647309                                                                                                                  | <i>Copadichromis chrysonotus</i>              | Monkey Bay (Mwawa Beach) | non-Mbuna          |
| EF647310-EF647312<br>EF647332-EF647340                                                                                             | <i>Copadichromis chrysonotus</i>              | Masaka                   | non-Mbuna          |
| EF647313-EF647319                                                                                                                  | <i>Copadichromis chrysonotus</i>              | Senga Bay                | non-Mbuna          |

|                                                                                                                            |                                              |                                           |                  |
|----------------------------------------------------------------------------------------------------------------------------|----------------------------------------------|-------------------------------------------|------------------|
| EF647320-EF647331                                                                                                          | <i>Copadichromis chrysonotus</i>             | Nkhotakota                                | non-Mbuna        |
| EF647341-EF647343<br>EF647391-EF647398                                                                                     | <i>Copadichromis quadrimaculatus</i>         | Chilumba                                  | non-Mbuna        |
| EF647344-EF647355                                                                                                          | <i>Copadichromis quadrimaculatus</i>         | Mbenji Islands                            | non-Mbuna        |
| EF647356- EF647359<br>EF647361-EF647367                                                                                    | <i>Mchenga eucinostomus</i>                  | Chilumba                                  | non-Mbuna        |
| EF647368-EF647379                                                                                                          | <i>Mchenga eucinostomus</i>                  | Nkope                                     | non-Mbuna        |
| EF647381-EF647390                                                                                                          | <i>Mchenga eucinostomus</i>                  | Nkhotakota                                | non-Mbuna        |
| EF647399-EF647411                                                                                                          | <i>Copadichromis quadrimaculatus</i>         | Nkhotakota                                | non-Mbuna        |
| EF647412-EF647419                                                                                                          | <i>Copadichromis quadrimaculatus</i>         | Nkhata Bay                                | non-Mbuna        |
| EF647430- EF647434<br>EF647436-EF647438                                                                                    | <i>Copadichromis quadrimaculatus</i>         | Malembo                                   | non-Mbuna        |
| EF647439-EF647450                                                                                                          | <i>Mchenga eucinostomus</i>                  | Senga Bay                                 | non-Mbuna        |
| EF647451-EF647460                                                                                                          | <i>Mchenga eucinostomus</i>                  | Chikombe                                  | non-Mbuna        |
| EF647470-EF647481                                                                                                          | <i>Copadichromis borleyi</i> 'Kadango'       | Wild caught Makanjila Point, Stuart Grant | non-Mbuna        |
| EF647482-EF647497                                                                                                          | <i>Copadichromis borleyi</i> 'Eastern'       | Wild caught Makanjila Point, Stuart Grant | non-Mbuna        |
| EF647498-EF647505                                                                                                          | <i>Mchenga eucinostomus</i>                  | Nkhata Bay                                | non-Mbuna        |
| EF647518-EF647519                                                                                                          | <i>Copadichromis trimaculatus</i>            | Chikombe                                  | non-Mbuna        |
| EF647520-EF647531                                                                                                          | <i>Copadichromis borleyi</i>                 | Chilumba                                  | non-Mbuna        |
| EF647570                                                                                                                   | <i>Copadichromis</i> sp. 'meta'              | Metangula                                 | non-Mbuna        |
| EF647569                                                                                                                   | <i>Copadichromis cyaneus</i>                 | Tchulutcha Reef in front of Metangula     | non-Mbuna        |
| EF647577                                                                                                                   | <i>Copadichromis trimaculatus</i>            | Iwela, 10 miles N of Manda Bay            | virginalis clade |
| EF647209-EF647210<br>EF647212-EF647215<br>EF647217-EF647218<br>EF647220-EF647221<br>EF647223-EF647225<br>EF647228-EF647229 | <i>Copadichromis</i> sp. 'virginalis kajose' | Lake Malombe                              | virginalis clade |
| EF211848-EF211850<br>EF211852-EF211855<br>EF211857-EF211867<br>EF211905-EF211912<br>EF211914- EF211924                     | <i>Copadichromis</i> sp. 'virginalis kajose' | Chilumba                                  | virginalis clade |
| EF647252                                                                                                                   | <i>Copadichromis</i> sp. 'virginalis kajose' | Nkhata Bay                                | virginalis clade |
| EF647240-EF647247<br>EF647249-EF647250                                                                                     | <i>Copadichromis</i> sp. 'virginalis kajose' | Nkhotakota                                | virginalis clade |

|                                                                                                                                                                                                 |                                              |                |                  |
|-------------------------------------------------------------------------------------------------------------------------------------------------------------------------------------------------|----------------------------------------------|----------------|------------------|
| EF647261-EF647272                                                                                                                                                                               | <i>Copadichromis</i> sp. 'virginalis kajose' | Mbenji Islands | virginalis clade |
| EF211832-EF211835<br>EF211837-EF211838<br>EF211840-EF211847<br>EF211888<br>EF211890-EF211892<br>EF211896<br>EF211900-EF211901<br>EF211903-EF211904                                              | <i>Copadichromis</i> sp. 'virginalis kajose' | Senga Bay      | virginalis clade |
| EF211868-EF211869<br>EF211872-EF211875<br>EF211880<br>EF211883-EF211886<br>EF211925-EF211927<br>EF211929<br>EF211934<br>EF211936-EF211937<br>EF211939-EF211941<br>EF211943<br>EF211945-EF211946 | <i>Copadichromis</i> sp. 'virginalis kajose' | Nkhudzi Bay    | virginalis clade |
| EF647232                                                                                                                                                                                        | <i>Copadichromis</i> sp. 'virginalis kajose' | Chenga trawl   | virginalis clade |
| EF647360                                                                                                                                                                                        | <i>Mchenga eucinostomus</i>                  | Chilumba       | virginalis clade |
| EF647380                                                                                                                                                                                        | <i>Mchenga eucinostomus</i>                  | Nkhotakota     | virginalis clade |
| EF647435                                                                                                                                                                                        | <i>Copadichromis quadrimaculatus</i>         | Malembo        | virginalis clade |
